# Supplementary material for: Porcine Reproductive and Respiratory Syndrome (PRRS) and CD163 Resistance Polymorphic Markers: What Is the Scenario in Naturally Infected Pig Livestock in Central Italy?
Source: MDPI journal article supplement (doi:10.3390/ani13152477), 2023-07-31
Supplement: s1 [file s1]

Figure S1: Pairwise linkage disequilibrium (LD) plot for the variants in *CD163* gene, expressed as  $D'$  values represented within the matrix.

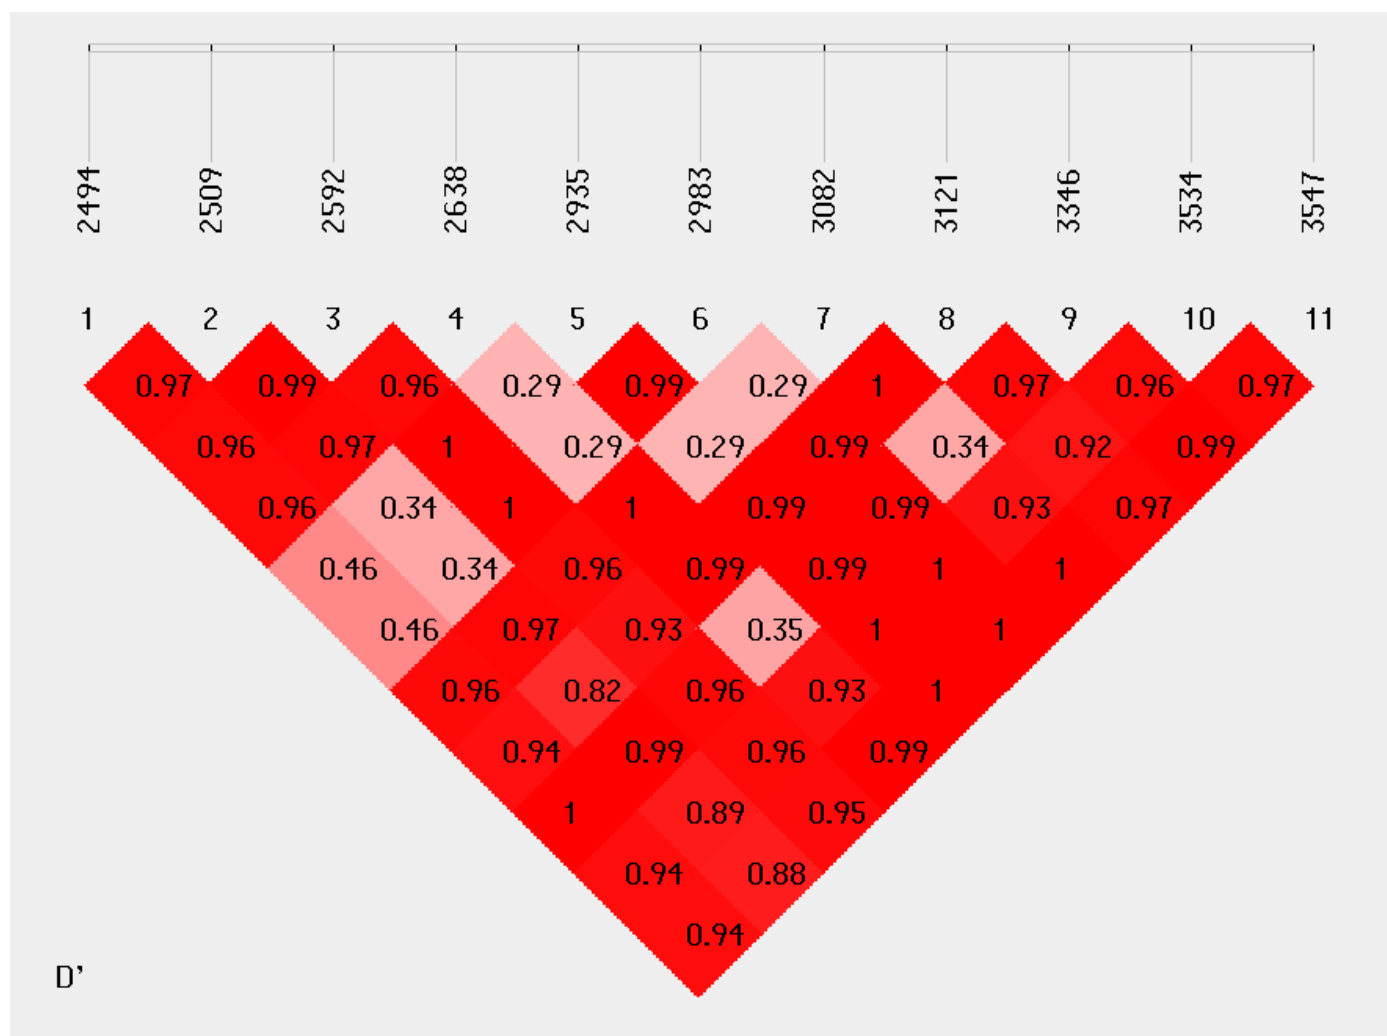

Dark red boxes indicate strong LD; lighter red boxes indicate progressively lesser LD
