# Supplementary material for: Porcine Reproductive and Respiratory Syndrome (PRRS) and CD163 Resistance Polymorphic Markers: What Is the Scenario in Naturally Infected Pig Livestock in Central Italy?
Source: MDPI journal article supplement (doi:10.3390/ani13152477), 2023-07-31
Supplement: s1 [file s1]

Table S1: Frequencies (%) of haplotypes and genotypes reconstructed by Phase v 2.1 software

| N  | Haplotype    | N   | Freq. (%) | Genotype | Healthy | Infected | Total | Freq. (%) |
|----|--------------|-----|-----------|----------|---------|----------|-------|-----------|
| 1  | GGAGGCCTGCA  | 6   | 0,80      | (16,16)  | 50      | 15       | 65    | 17,2      |
| 2  | GGAGGCCTGTA  | 17  | 2,25      | (16,30)  | 57      | 6        | 63    | 16,7      |
| 3  | GGAGGCCTACA  | 120 | 15,92     | (3,9)    | 46      | 1        | 47    | 12,5      |
| 4  | GGAGGCCTATA  | 2   | 0,27      | (3,16)   | 38      |          | 38    | 10,1      |
| 5  | GGAGGCCCGCG  | 6   | 0,80      | (9,30)   | 29      | 3        | 32    | 8,5       |
| 6  | GGAGGCCACACA | 1   | 0,13      | (3,30)   | 14      | 6        | 20    | 5,3       |
| 7  | GGAGGCTTGCA  | 1   | 0,13      | (30,30)  | 18      | 1        | 19    | 5,03      |
| 8  | GGAGAACCGCG  | 1   | 0,13      | (9,16)   | 16      |          | 16    | 4,2       |
| 9  | GGAAGCTTGCA  | 103 | 13,66     | (2,30)   | 6       |          | 6     | 1,6       |
| 10 | GGAAGCTTGTA  | 6   | 0,80      | (16,19)  | 4       |          | 4     | 1,06      |
| 11 | GGGGGCCTGCG  | 1   | 0,13      | (3,3)    | 3       |          | 3     | 0,8       |
| 12 | GGGGGCCTACA  | 1   | 0,13      | (1,20)   |         | 2        | 2     | 0,53      |
| 13 | GGGGGCCCGCG  | 7   | 0,93      | (1,30)   | 2       |          | 2     | 0,53      |
| 14 | GGGAGCTTGCA  | 1   | 0,13      | (10,32)  | 2       |          | 2     | 0,53      |
| 15 | GCAGGCCTGCA  | 1   | 0,13      | (13,16)  | 2       |          | 2     | 0,53      |
| 16 | GCAGGCCTGTA  | 265 | 35,15     | (19,30)  | 1       | 1        | 2     | 0,53      |
| 17 | GCAGGCCTACA  | 1   | 0,13      | (2,2)    | 2       |          | 2     | 0,53      |
| 18 | GCAGGCCTATA  | 1   | 0,13      | (2,3)    | 1       | 1        | 2     | 0,53      |
| 19 | GCAGGCCCGCG  | 7   | 0,93      | (22,30)  | 2       |          | 2     | 0,53      |
| 20 | GCAGGCCCGCA  | 3   | 0,40      | (27,30)  | 2       |          | 2     | 0,53      |
| 21 | GCAGGCCCGTA  | 8   | 1,06      | (3,21)   | 2       |          | 2     | 0,53      |
| 22 | GCAGAACCGCG  | 3   | 0,40      | (5,16)   | 2       |          | 2     | 0,53      |
| 23 | GCAAGCTTGCA  | 1   | 0,13      | (9,13)   | 2       |          | 2     | 0,53      |
| 24 | GCGGGCCCGCG  | 1   | 0,13      | (3,10)   | 2       |          | 2     | 0,53      |
| 25 | AGAGGCCCGCG  | 2   | 0,27      | (13,21)  | 1       |          | 1     | 0,26      |
| 26 | AGAAGCTTGCA  | 1   | 0,13      | (16,20)  | 1       |          | 1     | 0,26      |
| 27 | AGGGGCCTGCG  | 3   | 0,40      | (16,25)  | 1       |          | 1     | 0,26      |
| 28 | AGGGGCCTGTA  | 2   | 0,27      | (16,27)  | 1       |          | 1     | 0,26      |
| 29 | AGGGGCCTACA  | 1   | 0,13      | (16,29)  | 1       |          | 1     | 0,26      |
| 30 | AGGGGCCCGCG  | 174 | 23,08     | (16,33)  |         | 1        | 1     | 0,26      |
| 31 | AGGGGCCCGCA  | 1   | 0,13      | (2,16)   | 1       |          | 1     | 0,26      |
| 32 | AGGGGCCCGTG  | 2   | 0,27      | (2,21)   | 1       |          | 1     | 0,26      |
| 33 | AGGGGCTCGCG  | 1   | 0,13      | (2,28)   | 1       |          | 1     | 0,26      |
| 34 | AGGGAACCGCG  | 1   | 0,13      | (2,8)    | 1       |          | 1     | 0,26      |
| 35 | ACAGGCCTGTA  | 1   | 0,13      | (21,21)  | 1       |          | 1     | 0,26      |
| 36 | ACAGGCCCGCA  | 1   | 0,13      | (21,30)  | 1       |          | 1     | 0,26      |
|    |              |     |           | (22,23)  |         | 1        | 1     | 0,26      |
|    |              |     |           | (24,9)   | 1       |          | 1     | 0,26      |
|    |              |     |           | (26,30)  | 1       |          | 1     | 0,26      |
|    |              |     |           | (3,28)   | 1       |          | 1     | 0,26      |
|    |              |     |           | (30,36)  |         | 1        | 1     | 0,26      |
|    |              |     |           | (4,10)   | 1       |          | 1     | 0,26      |
|    |              |     |           | (4,16)   | 1       |          | 1     | 0,26      |
|    |              |     |           | (5,10)   | 1       |          | 1     | 0,26      |
|    |              |     |           | (5,5)    | 1       |          | 1     | 0,26      |
|    |              |     |           | (5,9)    | 1       |          | 1     | 0,26      |

| N | Haplotype | N | Freq. (%) | Genotype | Healthy | Infected | Total | Freq. (%) |
|---|-----------|---|-----------|----------|---------|----------|-------|-----------|
|   |           |   |           | (7,30)   | 1       |          | 1     | 0,26      |
|   |           |   |           | (9,21)   | 1       |          | 1     | 0,26      |
|   |           |   |           | (9,25)   | 1       |          | 1     | 0,26      |
|   |           |   |           | (9,34)   |         | 1        | 1     | 0,26      |
|   |           |   |           | (16,35)  | 1       |          | 1     | 0,26      |
|   |           |   |           | (12,14)  | 1       |          | 1     | 0,26      |
|   |           |   |           | (11,16)  | 1       |          | 1     | 0,26      |
|   |           |   |           | (1,1)    | 1       |          | 1     | 0,26      |
|   |           |   |           | (2,13)   | 1       |          | 1     | 0,26      |
|   |           |   |           | (9,18)   | 1       |          | 1     | 0,26      |
|   |           |   |           | (6,30)   | 1       |          | 1     | 0,26      |
|   |           |   |           | (15,30)  | 1       |          | 1     | 0,26      |
|   |           |   |           | (17,30)  | 1       |          | 1     | 0,26      |
|   |           |   |           | (3,13)   | 1       |          | 1     | 0,26      |
|   |           |   |           | (3,19)   | 1       |          | 1     | 0,26      |
|   |           |   |           | (16,31)  | 1       |          | 1     | 0,26      |
